# Supplementary material for: Patient satisfaction and perceived quality of care: evidence from a cross-sectional national exit survey of HIV and non-HIV service users in Zambia
Source: HighWire-hosted journal article supplement (doi:10.1136/bmjopen-2015-009700), 2015-12-01
Supplement: bmjopen-2015-009700supp.pdf [file bmjopen-2015-009700supp.pdf]

## Appendix

**Appendix Figure 1: Distribution of overall facility ratings, out of 10**

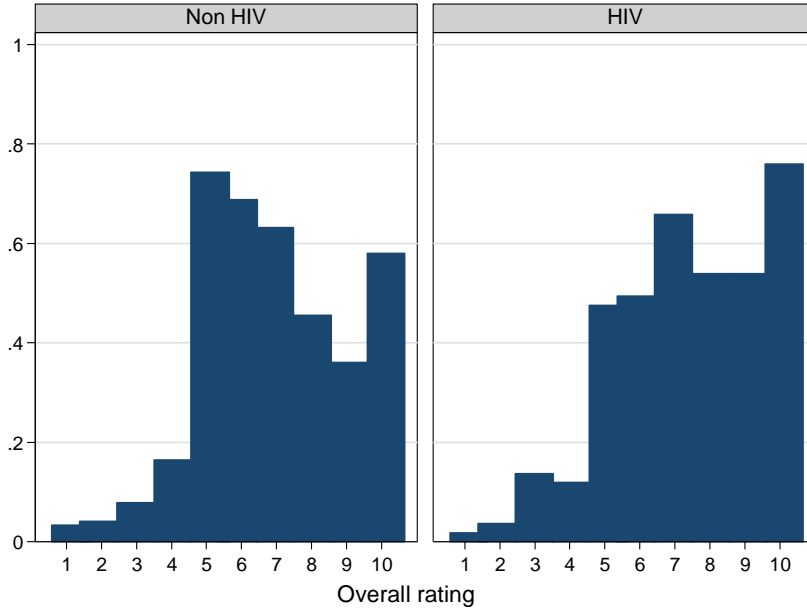

**Appendix Figure 2: Distribution of overall satisfaction among non-HIV patients stratified by facility management and whether the patient paid medical fees**

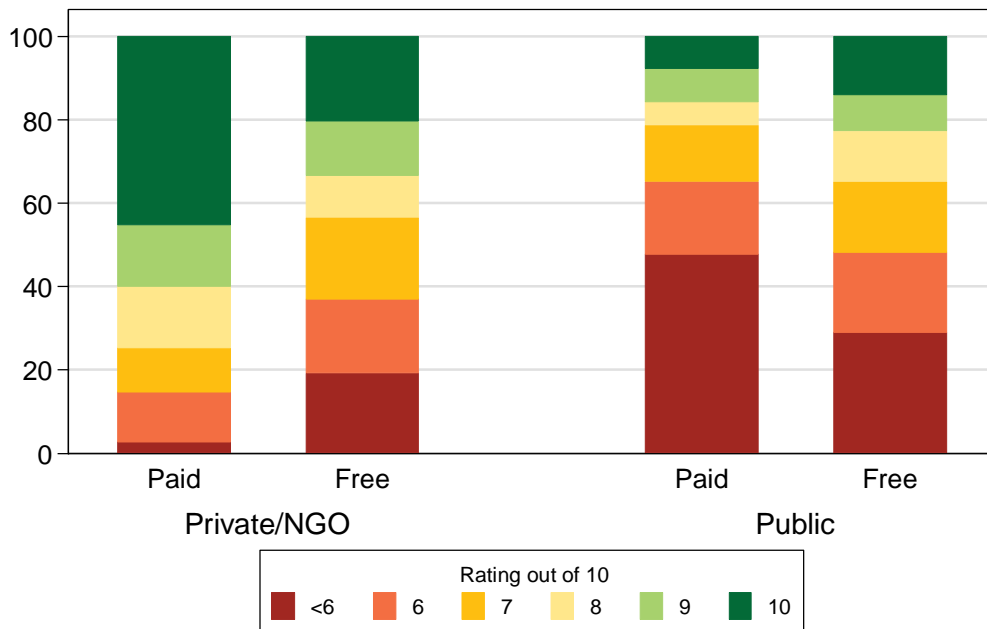

**Appendix Table 1: Comparison of sample characteristics to Zambian national characteristics**

|                          | <b>Study sample</b>         | <b>National</b>                   | <b>National source</b>                           |
|--------------------------|-----------------------------|-----------------------------------|--------------------------------------------------|
| <b>Health facilities</b> |                             |                                   |                                                  |
| N                        | 104                         | 1,958                             |                                                  |
| Facility type            |                             |                                   |                                                  |
| Hospital                 | 21 (20.2%)                  | 111 (5.7%)                        |                                                  |
| Urban HC                 | 31 (29.8%)                  | 409 (20.8%)                       |                                                  |
| Rural HC                 | 45 (43.27%)                 | 1,131 (58.8%)                     | Zambian health facility roster [1]               |
| Health Post              | 7 (6.7%)                    | 307 (15.7%)                       |                                                  |
| Ownership                |                             |                                   |                                                  |
| Public (GRZ)             | 84 (81%)                    | 1592 (81.3%)                      |                                                  |
| Mission/NGO              | 10 (9.6%)                   | 116 (5.9%)                        |                                                  |
| Private                  | 10 (9.6%)                   | 250 (12.8%)                       |                                                  |
| <b>Population</b>        |                             |                                   |                                                  |
| N                        | 2,528                       | 13,092,666                        | Zambia 2010 Census of Population and Housing [2] |
| % male                   | 32.5%                       | 49.3%                             |                                                  |
| HIV indicator            | 16.3% were seeking HIV care | 13.3% prevalence for adults 15-49 | 2013-14 Demographic and Health Survey [3]        |

**Appendix Table 2: Factor analysis of perceived quality questions**

| Domain                                 | Specific questions             | Components |         |         |         |         |
|----------------------------------------|--------------------------------|------------|---------|---------|---------|---------|
|                                        |                                | 1          | 2       | 3       | 4       | 5       |
| Health personnel practices and conduct | Compassion and support         | 0.2594     | -0.3282 | 0.1379  | 0.0098  | -0.0218 |
|                                        | Respect                        | 0.2552     | -0.3274 | 0.1871  | -0.0442 | -0.0052 |
|                                        | Reception                      | 0.2588     | -0.3042 | 0.2153  | -0.004  | -0.0262 |
|                                        | Honesty                        | 0.2585     | -0.2735 | 0.064   | 0.0309  | 0.0167  |
|                                        | Clinical examination           | 0.2634     | -0.1831 | -0.0216 | -0.014  | 0.0682  |
|                                        | Privacy                        | 0.2375     | -0.2237 | -0.0326 | 0.0263  | 0.0294  |
|                                        | Involvement in decision making | 0.2199     | -0.1498 | 0.1427  | -0.0314 | -0.0216 |
| Adequacy of resources and services     | Medical equipment adequacy     | 0.1754     | 0.1933  | 0.0148  | -0.4075 | 0.3361  |
|                                        | Facility cleanliness           | 0.1971     | 0.25    | 0.1831  | -0.2906 | 0.2524  |
|                                        | Facility spaciousness          | 0.1841     | 0.3024  | 0.3009  | -0.2539 | 0.1881  |
|                                        | Drug availability              | 0.2432     | 0.2113  | -0.0684 | -0.1519 | 0.1224  |
| Healthcare delivery                    | Good diagnosis                 | 0.2602     | 0.092   | -0.3147 | 0.0427  | -0.0431 |
|                                        | Prescription of good drugs     | 0.2689     | 0.0988  | -0.3198 | 0.0215  | -0.0953 |
|                                        | Drug quality                   | 0.2566     | 0.1068  | -0.3552 | 0.0639  | -0.1233 |
|                                        | Treatment effectiveness        | 0.2399     | 0.0853  | -0.4139 | 0.038   | -0.0249 |
| Accessibility of care                  | Hours of operation             | 0.1886     | 0.2029  | 0.0402  | 0.1895  | -0.0081 |
|                                        | Ease of obtaining drugs        | 0.233      | 0.17    | -0.016  | 0.2301  | -0.1608 |
|                                        | Distance to health facility    | 0.1377     | 0.2686  | 0.3321  | 0.3717  | -0.2472 |
|                                        | Wait time                      | 0.1566     | 0.3068  | 0.3598  | 0.2936  | -0.1428 |
| Cost of care                           | Cost of care                   | -0.0177    | -0.0496 | -0.0658 | 0.5797  | 0.7946  |

**Appendix Table 3a: Ordered logistic regression results examining demographic and facility-level factors as predictors of overall patient satisfaction, stratified by whether the respondent was a patient or attendant**

|                                          | Patient             | Attendant         |
|------------------------------------------|---------------------|-------------------|
| Age                                      | 1.00 [0.99,1.01]    | 0.99 [0.97,1.01]  |
| Education of respondent (ref: None)      | 0.86 [0.54,1.38]    | 0.89 [0.60,1.32]  |
| Primary                                  |                     |                   |
| Post primary                             | 0.76 [0.47,1.28]    | 0.60* [0.37,0.96] |
| Self-rated very good or excellent health | 1.25 [0.94,1.65]    | 1.21 [0.78,1.88]  |
| Ethnicity (ref: Other)                   |                     |                   |
| Tonga                                    | 0.87 [0.63,1.19]    | 0.74 [0.50,1.10]  |
| Chewa Nyanja                             | 0.81 [0.56,1.17]    | 0.46 [0.21,1.00]  |
| Male respondent                          | 0.98 [0.80,1.21]    | 1.30 [0.82,2.05]  |
| MOH managed (ref: Private/NGO)           | 0.35** [0.16,0.75]  | 0.96 [0.25,3.70]  |
| Rural (ref: Urban)                       | 0.36*** [0.20,0.63] | 0.59 [0.25,1.39]  |
| Hospital (ref: Health center or post)    | 1.68 [0.86,3.28]    | 3.20 [0.98,10.42] |
| Traveled an hour or more                 | 0.79 [0.61,1.02]    | 0.84 [0.56,1.26]  |
| Waited an hour or more                   | 0.79 [0.59,1.05]    | 1.12 [0.72,1.75]  |
| Saw doctor or CO (ref: Nurse/other)      | 0.84 [0.54,1.29]    | 0.94 [0.42,2.09]  |
| HIV visit                                | 1.48* [1.02,2.13]   | 0.85 [0.39,1.85]  |
| N                                        | 1675                | 650               |

**Appendix Table 3b: Ordered logistic regression results examining demographic and facility-level factors as predictors of overall patient satisfaction, stratified by hospitals vs. health centers/posts**

|                                          | Hospitals            | Health centers/posts |
|------------------------------------------|----------------------|----------------------|
| Age                                      | 1 [0.99,1.01]        | 1.00 [0.99,1.01]     |
| Male respondent                          | 0.76 [0.48,1.22]     | 1.12 [0.92,1.38]     |
| Education of respondent (ref: None)      |                      |                      |
| Primary                                  | 0.65 [0.23,1.85]     | 0.82 [0.60,1.13]     |
| Post primary                             | 0.75 [0.27,2.07]     | 0.65* [0.46,0.92]    |
| Self-rated very good or excellent health | 1.26 [0.84,1.88]     | 1.20 [0.92,1.56]     |
| Ethnicity (ref: Other)                   |                      |                      |
| Tonga                                    | 0.82 [0.50,1.35]     | 0.83 [0.67,1.02]     |
| Chewa Nyanja                             | 0.67 [0.20,2.18]     | 0.83 [0.64,1.07]     |
| Patient respondent                       | 1.08 [0.63,1.83]     | 0.88 [0.67,1.14]     |
| MOH managed (ref: Private/NGO)           | 2.42* [1.09,5.37]    | 0.24*** [0.13,0.42]  |
| Rural (ref: Urban)                       | 0.090*** [0.06,0.14] | 1.14 [0.52,2.50]     |
| Traveled an hour or more                 | 0.93 [0.56,1.56]     | 0.81* [0.66,0.99]    |
| Waited an hour or more                   | 0.30*** [0.20,0.44]  | 0.97 [0.70,1.34]     |
| Saw doctor or CO (ref: Nurse/other)      | 0.95 [0.46,1.95]     | 0.78 [0.54,1.13]     |
| HIV visit                                | 1.29 [0.84,1.96]     | 1.23 [0.89,1.71]     |
| N                                        | 501                  | 1824                 |

**Appendix Table 3c: Ordered logistic regression results examining demographic and facility-level factors as predictors of overall patient satisfaction, stratified by rural vs. urban facility location**

|                                          | Rural   |             | Urban    |               |
|------------------------------------------|---------|-------------|----------|---------------|
| Age                                      | 1.00    | [0.99,1.01] | 1.00     | [0.99,1.01]   |
| Male respondent                          | 1.03    | [0.82,1.29] | 1.12     | [0.83,1.50]   |
| Education of respondent (ref: None)      |         |             |          |               |
| Primary                                  | 0.79    | [0.56,1.13] | 0.71     | [0.39,1.29]   |
| Post primary                             | 0.72    | [0.48,1.09] | 0.56*    | [0.33,0.95]   |
| Self-rated very good or excellent health | 1.20    | [0.91,1.59] | 1.62**   | [1.21,2.17]   |
| Ethnicity (ref: Other)                   |         |             |          |               |
| Tonga                                    | 0.67*   | [0.49,0.93] | 0.97     | [0.74,1.29]   |
| Chewa Nyanja                             | 0.92    | [0.66,1.29] | 0.86     | [0.56,1.31]   |
| Patient respondent                       | 0.78    | [0.55,1.10] | 0.99     | [0.72,1.35]   |
| MOH managed (ref: Private/NGO)           | 0.17*** | [0.08,0.35] | 0.86     | [0.64,1.16]   |
| Hospital (ref: Health center or post)    | 0.18*** | [0.10,0.34] | 16.84*** | [10.70,26.51] |
| Traveled an hour or more                 | 0.81    | [0.63,1.04] | 0.86     | [0.64,1.16]   |
| Waited an hour or more                   | 1.01    | [0.76,1.34] | 0.63***  | [0.51,0.79]   |
| Saw doctor or CO (ref: Nurse/other)      | 0.82    | [0.57,1.17] | 0.83     | [0.59,1.18]   |
| HIV visit                                | 1.27    | [0.88,1.81] | 1.23     | [0.85,1.77]   |
| N                                        | 1188    |             | 1137     |               |

**Appendix Table 3d: Ordered logistic regression results examining demographic and facility-level factors as predictors of overall patient satisfaction, stratified by public vs. NGO/Private management**

|                                          | Public              | NGO/Private          |
|------------------------------------------|---------------------|----------------------|
| Age                                      | 1.00 [0.99,1.01]    | 0.99 [0.98,1.01]     |
| Male respondent                          | 1.06 [0.86,1.29]    | 1.12 [0.76,1.64]     |
| Education of respondent (ref: None)      |                     |                      |
| Primary                                  | 0.89 [0.65,1.22]    | 0.65 [0.24,1.73]     |
| Post primary                             | 0.69* [0.49,0.97]   | 0.77 [0.24,2.49]     |
| Self-rated very good or excellent health | 1.07 [0.82,1.38]    | 1.71* [1.05,2.78]    |
| Ethnicity (ref: Other)                   |                     |                      |
| Tonga                                    | 0.82 [0.53,1.25]    | 0.81 [0.50,1.29]     |
| Chewa Nyanja                             | 0.92 [0.69,1.22]    | 0.56* [0.35,0.90]    |
| Patient respondent                       | 0.86 [0.65,1.13]    | 0.95 [0.57,1.60]     |
| Hospital (ref: Health center or post)    | 3.45*** [1.99,5.97] | 2.21** [1.35,3.60]   |
| Rural (ref: Urban)                       | 0.39*** [0.26,0.58] | 0.072*** [0.04,0.13] |
| Traveled an hour or more                 | 0.80 [0.61,1.05]    | 0.80 [0.48,1.33]     |
| Waited an hour or more                   | 0.80 [0.62,1.05]    | 0.40*** [0.29,0.55]  |
| Saw doctor or CO (ref: Nurse/other)      | 0.76 [0.53,1.08]    | 1.16 [0.76,1.77]     |
| HIV visit                                | 1.34* [1.01,1.77]   | 0.79 [0.37,1.68]     |
| N                                        | 1864                | 461                  |

**Appendix Table 4: Distribution and means of ratings by facility grouping, and p-values from Chi-squared and ANOVA tests for independence**

| <b>Non-HIV Patients</b> | Public Urban Hospital | Public Urban Hospital | Public Rural Hospital | Public Rural Center/post | Private/NGO Urban Center/post | Private/NGO Urban Center/post | Private/NGO Rural Center/post | Private/NGO Rural Center/post | P-value (Chi sq) | P-value (ANOVA) |
|-------------------------|-----------------------|-----------------------|-----------------------|--------------------------|-------------------------------|-------------------------------|-------------------------------|-------------------------------|------------------|-----------------|
| <b>Overall rating</b>   |                       |                       |                       |                          |                               |                               |                               |                               |                  |                 |
| <=5                     | 7                     | 191                   | 28                    | 312                      | 20                            | 25                            | 11                            | 0                             | 0.00             | 0.00            |
| 6                       | 7                     | 104                   | 7                     | 211                      | 9                             | 10                            | 34                            | 3                             |                  |                 |
| 7                       | 16                    | 80                    | 2                     | 190                      | 21                            | 10                            | 23                            | 12                            |                  |                 |
| 8                       | 14                    | 67                    | 2                     | 118                      | 21                            | 20                            | 8                             | 5                             |                  |                 |
| 9                       | 14                    | 60                    | 1                     | 79                       | 16                            | 23                            | 7                             | 2                             |                  |                 |
| 10                      | 40                    | 85                    | 2                     | 111                      | 48                            | 39                            | 0                             | 0                             |                  |                 |
| Mean (0-10)             | 8.38                  | 6.80                  | 4.79                  | 6.65                     | 7.94                          | 7.61                          | 6.52                          | 7.27                          |                  |                 |
| <b>Compassion</b>       |                       |                       |                       |                          |                               |                               |                               |                               |                  |                 |
| Very bad                | 0                     | 7                     | 0                     | 2                        | 2                             | 1                             | 1                             | 0                             | 0.00             | 0.00            |
| Bad                     | 2                     | 17                    | 4                     | 43                       | 2                             | 0                             | 1                             | 0                             |                  |                 |
| Moderate                | 12                    | 88                    | 21                    | 166                      | 17                            | 12                            | 8                             | 2                             |                  |                 |
| Good                    | 54                    | 323                   | 16                    | 566                      | 45                            | 48                            | 59                            | 20                            |                  |                 |
| Very good               | 29                    | 147                   | 1                     | 242                      | 69                            | 66                            | 14                            | 0                             |                  |                 |
| Mean (1-5)              | 4.13                  | 4.01                  | 3.33                  | 3.98                     | 4.31                          | 4.40                          | 4.01                          | 3.91                          |                  |                 |
| <b>Respect</b>          |                       |                       |                       |                          |                               |                               |                               |                               |                  |                 |
| Very bad                | 0                     | 4                     | 0                     | 4                        | 2                             | 0                             | 1                             | 0                             | 0.00             | 0.00            |
| Bad                     | 1                     | 21                    | 7                     | 38                       | 4                             | 0                             | 1                             | 0                             |                  |                 |
| Moderate                | 13                    | 83                    | 13                    | 121                      | 7                             | 9                             | 8                             | 4                             |                  |                 |
| Good                    | 59                    | 306                   | 20                    | 579                      | 47                            | 48                            | 52                            | 16                            |                  |                 |
| Very good               | 25                    | 168                   | 2                     | 278                      | 75                            | 70                            | 21                            | 2                             |                  |                 |
| Mean (1-5)              | 4.10                  | 4.05                  | 3.40                  | 4.07                     | 4.40                          | 4.48                          | 4.10                          | 3.91                          |                  |                 |
| <b>Reception</b>        |                       |                       |                       |                          |                               |                               |                               |                               |                  |                 |
| Very bad                | 0                     | 4                     | 2                     | 4                        | 1                             | 0                             | 1                             | 0                             | 0.00             | 0.00            |
| Bad                     | 2                     | 22                    | 13                    | 56                       | 5                             | 0                             | 1                             | 2                             |                  |                 |
| Moderate                | 11                    | 85                    | 13                    | 118                      | 15                            | 11                            | 8                             | 11                            |                  |                 |
| Good                    | 57                    | 325                   | 12                    | 540                      | 50                            | 54                            | 53                            | 9                             |                  |                 |



|                    |      |      |      |      |      |      |      |      |      |      |
|--------------------|------|------|------|------|------|------|------|------|------|------|
| Very good          | 28   | 145  | 2    | 302  | 64   | 62   | 20   | 0    |      |      |
| Mean (1-5)         | 4.13 | 4.01 | 2.98 | 4.06 | 4.27 | 4.40 | 4.08 | 3.32 |      |      |
| <b>Honest</b>      |      |      |      |      |      |      |      |      |      |      |
| Very bad           | 0    | 2    | 0    | 7    | 0    | 0    | 0    | 0    |      |      |
| Bad                | 2    | 17   | 3    | 36   | 2    | 1    | 2    | 0    |      |      |
| Moderate           | 10   | 74   | 12   | 118  | 18   | 12   | 6    | 2    | 0.00 | 0.00 |
| Good               | 61   | 324  | 18   | 560  | 46   | 54   | 55   | 16   |      |      |
| Very good          | 25   | 164  | 9    | 284  | 68   | 60   | 20   | 4    |      |      |
| Mean (1-5)         | 4.11 | 4.09 | 3.79 | 4.07 | 4.34 | 4.36 | 4.12 | 4.09 |      |      |
| <b>Exam</b>        |      |      |      |      |      |      |      |      |      |      |
| Very bad           | 0    | 2    | 0    | 4    | 0    | 0    | 0    | 0    |      |      |
| Bad                | 4    | 20   | 2    | 50   | 3    | 4    | 1    | 0    |      |      |
| Moderate           | 10   | 93   | 17   | 170  | 14   | 16   | 10   | 2    | 0.00 | 0.00 |
| Good               | 60   | 323  | 17   | 551  | 48   | 57   | 53   | 10   |      |      |
| Very good          | 24   | 134  | 6    | 233  | 70   | 50   | 19   | 10   |      |      |
| Mean (1-5)         | 4.06 | 3.99 | 3.64 | 3.95 | 4.37 | 4.20 | 4.08 | 4.36 |      |      |
| <b>Privacy</b>     |      |      |      |      |      |      |      |      |      |      |
| Very bad           | 0    | 4    | 1    | 3    | 1    | 0    | 0    | 0    |      |      |
| Bad                | 5    | 9    | 2    | 30   | 3    | 2    | 1    | 0    |      |      |
| Moderate           | 9    | 71   | 10   | 127  | 7    | 20   | 11   | 1    | 0.00 | 0.00 |
| Good               | 54   | 320  | 14   | 486  | 43   | 48   | 51   | 9    |      |      |
| Very good          | 30   | 175  | 14   | 366  | 81   | 56   | 20   | 12   |      |      |
| Mean (1-5)         | 4.11 | 4.13 | 3.93 | 4.17 | 4.48 | 4.25 | 4.08 | 4.50 |      |      |
| <b>Involvement</b> |      |      |      |      |      |      |      |      |      |      |
| Very bad           | 0    | 10   | 4    | 26   | 1    | 0    | 1    | 0    |      |      |
| Bad                | 7    | 30   | 17   | 98   | 18   | 8    | 2    | 7    |      |      |
| Moderate           | 18   | 163  | 7    | 219  | 19   | 28   | 19   | 10   | 0.00 | 0.00 |
| Good               | 61   | 218  | 8    | 462  | 32   | 55   | 46   | 4    |      |      |
| Very good          | 11   | 113  | 4    | 173  | 65   | 36   | 15   | 0    |      |      |
| Mean (1-5)         | 3.78 | 3.74 | 2.78 | 3.67 | 4.05 | 3.94 | 3.87 | 2.86 |      |      |
| <b>Equipment</b>   |      |      |      |      |      |      |      |      |      |      |
| Very bad           | 0    | 49   | 0    | 99   | 1    | 5    | 1    | 0    | 0.00 | 0.00 |

|                  |      |      |      |      |      |      |      |      |      |      |
|------------------|------|------|------|------|------|------|------|------|------|------|
| Bad              | 4    | 73   | 5    | 270  | 4    | 7    | 3    | 0    |      |      |
| Moderate         | 16   | 219  | 19   | 291  | 19   | 45   | 47   | 2    |      |      |
| Good             | 62   | 187  | 14   | 247  | 41   | 30   | 27   | 17   |      |      |
| Very good        | 14   | 34   | 4    | 70   | 68   | 37   | 0    | 3    |      |      |
| Mean (1-5)       | 3.90 | 3.15 | 3.40 | 2.92 | 4.29 | 3.70 | 3.28 | 4.05 |      |      |
| <b>Clean</b>     |      |      |      |      |      |      |      |      |      |      |
| Very bad         | 0    | 27   | 7    | 22   | 0    | 1    | 0    | 0    |      |      |
| Bad              | 8    | 82   | 19   | 94   | 11   | 2    | 1    | 0    |      |      |
| Moderate         | 17   | 205  | 11   | 332  | 11   | 14   | 36   | 1    | 0.00 | 0.00 |
| Good             | 43   | 212  | 3    | 451  | 33   | 43   | 40   | 14   |      |      |
| Very good        | 30   | 59   | 2    | 120  | 80   | 67   | 6    | 7    |      |      |
| Mean (1-5)       | 3.97 | 3.33 | 2.38 | 3.54 | 4.35 | 4.36 | 3.61 | 4.27 |      |      |
| <b>Space</b>     |      |      |      |      |      |      |      |      |      |      |
| Very bad         | 1    | 58   | 4    | 93   | 0    | 1    | 1    | 0    |      |      |
| Bad              | 13   | 132  | 22   | 229  | 5    | 4    | 11   | 0    |      |      |
| Moderate         | 13   | 190  | 12   | 291  | 19   | 13   | 39   | 6    | 0.00 | 0.00 |
| Good             | 42   | 152  | 3    | 302  | 41   | 58   | 29   | 15   |      |      |
| Very good        | 29   | 52   | 1    | 103  | 70   | 51   | 3    | 1    |      |      |
| Mean (1-5)       | 3.87 | 3.01 | 2.40 | 3.09 | 4.30 | 4.21 | 3.27 | 3.77 |      |      |
| <b>Drug adq</b>  |      |      |      |      |      |      |      |      |      |      |
| Very bad         | 1    | 14   | 1    | 30   | 1    | 0    | 1    | 0    |      |      |
| Bad              | 4    | 48   | 9    | 105  | 7    | 4    | 0    | 0    |      |      |
| Moderate         | 13   | 185  | 21   | 365  | 9    | 18   | 44   | 5    | 0.00 | 0.00 |
| Good             | 55   | 260  | 8    | 352  | 38   | 48   | 32   | 16   |      |      |
| Very good        | 24   | 66   | 3    | 145  | 74   | 57   | 6    | 1    |      |      |
| Mean (1-5)       | 4.00 | 3.55 | 3.07 | 3.48 | 4.37 | 4.24 | 3.51 | 3.82 |      |      |
| <b>Diagnosis</b> |      |      |      |      |      |      |      |      |      |      |
| Very bad         | 0    | 5    | 0    | 6    | 0    | 0    | 0    | 0    |      |      |
| Bad              | 1    | 13   | 1    | 44   | 2    | 0    | 1    | 0    |      |      |
| Moderate         | 11   | 116  | 14   | 182  | 26   | 20   | 7    | 1    | 0.00 | 0.00 |
| Good             | 68   | 340  | 21   | 590  | 51   | 51   | 53   | 14   |      |      |
| Very good        | 17   | 107  | 5    | 189  | 56   | 55   | 22   | 7    |      |      |

|                        |      |      |      |      |      |      |      |      |      |      |
|------------------------|------|------|------|------|------|------|------|------|------|------|
| Mean (1-5)             | 4.04 | 3.91 | 3.73 | 3.90 | 4.19 | 4.28 | 4.16 | 4.27 |      |      |
| <b>Drug prescribed</b> |      |      |      |      |      |      |      |      |      |      |
| Very bad               | 0    | 3    | 1    | 9    | 1    | 0    | 1    | 0    |      |      |
| Bad                    | 2    | 17   | 0    | 43   | 3    | 0    | 0    | 0    |      |      |
| Moderate               | 10   | 97   | 12   | 176  | 13   | 20   | 6    | 2    | 0.00 | 0.00 |
| Good                   | 72   | 352  | 25   | 579  | 55   | 55   | 50   | 18   |      |      |
| Very good              | 14   | 113  | 4    | 208  | 63   | 52   | 26   | 2    |      |      |
| Mean (1-5)             | 4.00 | 3.95 | 3.74 | 3.92 | 4.30 | 4.25 | 4.20 | 4.00 |      |      |
| <b>Drug Q</b>          |      |      |      |      |      |      |      |      |      |      |
| Very bad               | 0    | 4    | 0    | 6    | 0    | 0    | 1    | 0    |      |      |
| Bad                    | 1    | 15   | 0    | 38   | 0    | 1    | 0    | 0    |      |      |
| Moderate               | 14   | 95   | 9    | 153  | 10   | 14   | 6    | 3    | 0.00 | 0.00 |
| Good                   | 68   | 358  | 20   | 585  | 55   | 47   | 55   | 16   |      |      |
| Very good              | 15   | 112  | 12   | 226  | 70   | 64   | 21   | 3    |      |      |
| Mean (1-5)             | 3.99 | 3.96 | 4.07 | 3.98 | 4.44 | 4.38 | 4.14 | 4.00 |      |      |
| <b>Treatment</b>       |      |      |      |      |      |      |      |      |      |      |
| Very bad               | 0    | 3    | 1    | 5    | 1    | 1    | 0    | 0    |      |      |
| Bad                    | 2    | 18   | 1    | 34   | 0    | 0    | 2    | 0    |      |      |
| Moderate               | 13   | 99   | 4    | 156  | 14   | 16   | 12   | 1    | 0.00 | 0.00 |
| Good                   | 68   | 347  | 15   | 569  | 60   | 52   | 52   | 10   |      |      |
| Very good              | 15   | 101  | 19   | 244  | 59   | 57   | 17   | 11   |      |      |
| Mean (1-5)             | 3.98 | 3.92 | 4.25 | 4.00 | 4.31 | 4.30 | 4.01 | 4.45 |      |      |
| <b>Hours</b>           |      |      |      |      |      |      |      |      |      |      |
| Very bad               | 0    | 10   | 1    | 26   | 0    | 1    | 0    | 0    |      |      |
| Bad                    | 2    | 50   | 7    | 113  | 8    | 8    | 1    | 0    |      |      |
| Moderate               | 10   | 151  | 22   | 224  | 24   | 21   | 14   | 3    | 0.00 | 0.00 |
| Good                   | 52   | 281  | 10   | 456  | 47   | 51   | 49   | 19   |      |      |
| Very good              | 34   | 88   | 1    | 192  | 56   | 46   | 19   | 0    |      |      |
| Mean (1-5)             | 4.20 | 3.67 | 3.07 | 3.67 | 4.12 | 4.05 | 4.04 | 3.86 |      |      |
| <b>Cost</b>            |      |      |      |      |      |      |      |      |      |      |
| Very bad               | 0    | 3    | 0    | 1    | 3    | 0    | 0    | 0    | 0.00 | 0.00 |

|                 |      |      |      |      |      |      |      |      |      |      |
|-----------------|------|------|------|------|------|------|------|------|------|------|
| Bad             | 2    | 2    | 1    | 0    | 5    | 3    | 3    | 0    |      |      |
| Moderate        | 3    | 24   | 0    | 10   | 8    | 14   | 4    | 1    |      |      |
| Good            | 4    | 44   | 0    | 23   | 30   | 14   | 7    | 1    |      |      |
| Very good       | 87   | 503  | 37   | 958  | 87   | 95   | 69   | 10   |      |      |
| Mean (1-5)      | 4.83 | 4.81 | 4.92 | 4.95 | 4.45 | 4.60 | 4.71 | 4.75 |      |      |
| <b>Drugs</b>    |      |      |      |      |      |      |      |      |      |      |
| Very bad        | 0    | 11   | 1    | 14   | 0    | 0    | 0    | 0    |      |      |
| Bad             | 4    | 16   | 6    | 44   | 2    | 4    | 2    | 1    |      |      |
| Moderate        | 12   | 127  | 23   | 208  | 12   | 16   | 20   | 4    | 0.00 | 0.00 |
| Good            | 54   | 332  | 6    | 441  | 47   | 46   | 37   | 17   |      |      |
| Very good       | 28   | 94   | 6    | 310  | 73   | 60   | 24   | 0    |      |      |
| Mean (1-5)      | 4.08 | 3.83 | 3.24 | 3.97 | 4.43 | 4.29 | 4.00 | 3.73 |      |      |
| <b>Distance</b> |      |      |      |      |      |      |      |      |      |      |
| Very bad        | 0    | 17   | 9    | 77   | 3    | 1    | 6    | 8    |      |      |
| Bad             | 12   | 55   | 18   | 195  | 17   | 0    | 15   | 8    |      |      |
| Moderate        | 15   | 150  | 9    | 262  | 30   | 21   | 23   | 4    | 0.00 | 0.00 |
| Good            | 55   | 278  | 6    | 310  | 52   | 70   | 28   | 1    |      |      |
| Very good       | 15   | 85   | 0    | 166  | 33   | 34   | 11   | 1    |      |      |
| Mean (1-5)      | 3.75 | 3.61 | 2.29 | 3.29 | 3.70 | 4.08 | 3.28 | 2.05 |      |      |
| <b>Wait</b>     |      |      |      |      |      |      |      |      |      |      |
| Very bad        | 1    | 33   | 8    | 99   | 2    | 1    | 4    | 0    |      |      |
| Bad             | 13   | 85   | 13   | 173  | 25   | 3    | 12   | 3    |      |      |
| Moderate        | 30   | 235  | 17   | 253  | 26   | 20   | 32   | 16   | 0.00 | 0.00 |
| Good            | 39   | 173  | 4    | 336  | 43   | 61   | 24   | 3    |      |      |
| Very good       | 15   | 61   | 0    | 142  | 39   | 41   | 11   | 0    |      |      |
| Mean (1-5)      | 3.55 | 3.25 | 2.40 | 3.25 | 3.68 | 4.10 | 3.31 | 3.00 |      |      |

| <b>HIV Patients</b>   | Public            | Public            | Public            | Public               | Private/NGO          | Private/NGO          | Private/NGO          | Private/NGO          | P-value (Chi<br>sqr) | P-value<br>(ANOVA) |
|-----------------------|-------------------|-------------------|-------------------|----------------------|----------------------|----------------------|----------------------|----------------------|----------------------|--------------------|
|                       | Urban<br>Hospital | Urban<br>Hospital | Rural<br>Hospital | Rural<br>Center/post | Urban<br>Center/post | Urban<br>Center/post | Rural<br>Center/post | Rural<br>Center/post |                      |                    |
| <b>Overall rating</b> |                   |                   |                   |                      |                      |                      |                      |                      |                      |                    |
| <=5                   | 6                 | 12                | 23                | 27                   | 14                   | 3                    | 1                    | 0                    | 0.00                 | 0.00               |
| 6                     | 4                 | 9                 | 7                 | 25                   | 1                    | 4                    | 4                    | 0                    |                      |                    |
| 7                     | 6                 | 13                | 9                 | 27                   | 3                    | 7                    | 3                    | 4                    |                      |                    |
| 8                     | 1                 | 17                | 4                 | 9                    | 5                    | 13                   | 7                    | 3                    |                      |                    |
| 9                     | 12                | 9                 | 4                 | 7                    | 5                    | 21                   | 1                    | 0                    |                      |                    |
| 10                    | 34                | 28                | 1                 | 2                    | 4                    | 13                   | 0                    | 1                    |                      |                    |
| Mean (0-10)           | 8.75              | 7.93              | 5.69              | 6.38                 | 6.25                 | 8.36                 | 7.19                 | 7.75                 |                      |                    |
| <b>Compassion</b>     |                   |                   |                   |                      |                      |                      |                      |                      |                      |                    |
| Very bad              | 0                 | 2                 | 2                 | 0                    | 0                    | 0                    | 0                    | 0                    | 0.00                 | 0.00               |
| Bad                   | 2                 | 5                 | 8                 | 1                    | 3                    | 0                    | 0                    | 0                    |                      |                    |
| Moderate              | 5                 | 16                | 6                 | 13                   | 6                    | 1                    | 2                    | 0                    |                      |                    |
| Good                  | 34                | 45                | 12                | 55                   | 12                   | 34                   | 5                    | 6                    |                      |                    |
| Very good             | 22                | 20                | 20                | 28                   | 11                   | 26                   | 9                    | 2                    |                      |                    |
| Mean (1-5)            | 4.21              | 3.86              | 3.83              | 4.13                 | 3.97                 | 4.41                 | 4.44                 | 4.25                 |                      |                    |
| <b>Respect</b>        |                   |                   |                   |                      |                      |                      |                      |                      |                      |                    |
| Very bad              | 0                 | 0                 | 0                 | 0                    | 0                    | 0                    | 0                    | 0                    | 0.00                 | 0.00               |
| Bad                   | 4                 | 4                 | 10                | 1                    | 2                    | 0                    | 0                    | 0                    |                      |                    |
| Moderate              | 4                 | 12                | 8                 | 9                    | 4                    | 1                    | 1                    | 0                    |                      |                    |
| Good                  | 38                | 50                | 12                | 51                   | 13                   | 33                   | 7                    | 4                    |                      |                    |
| Very good             | 17                | 22                | 18                | 36                   | 13                   | 27                   | 8                    | 4                    |                      |                    |
| Mean (1-5)            | 4.08              | 4.02              | 3.79              | 4.26                 | 4.16                 | 4.43                 | 4.44                 | 4.50                 |                      |                    |
| <b>Reception</b>      |                   |                   |                   |                      |                      |                      |                      |                      |                      |                    |
| Very bad              | 0                 | 0                 | 1                 | 0                    | 0                    | 0                    | 0                    | 0                    | 0.00                 | 0.00               |
| Bad                   | 2                 | 2                 | 13                | 4                    | 7                    | 0                    | 0                    | 0                    |                      |                    |
| Moderate              | 5                 | 12                | 7                 | 14                   | 6                    | 1                    | 1                    | 3                    |                      |                    |
| Good                  | 38                | 52                | 9                 | 46                   | 8                    | 33                   | 6                    | 5                    |                      |                    |
| Very good             | 18                | 22                | 18                | 33                   | 11                   | 27                   | 9                    | 0                    |                      |                    |
| Mean (1-5)            | 4.14              | 4.07              | 3.63              | 4.11                 | 3.72                 | 4.43                 | 4.50                 | 3.63                 |                      |                    |

**Honest**

|            |      |      |      |      |      |      |      |      |      |      |
|------------|------|------|------|------|------|------|------|------|------|------|
| Very bad   | 0    | 1    | 0    | 0    | 0    | 0    | 0    | 0    |      |      |
| Bad        | 1    | 2    | 6    | 0    | 5    | 0    | 0    | 0    |      |      |
| Moderate   | 8    | 12   | 10   | 11   | 4    | 2    | 1    | 0    | 0.00 | 0.00 |
| Good       | 35   | 50   | 13   | 50   | 13   | 34   | 5    | 6    |      |      |
| Very good  | 17   | 23   | 19   | 35   | 10   | 25   | 10   | 2    |      |      |
| Mean (1-5) | 4.11 | 4.05 | 3.94 | 4.25 | 3.88 | 4.38 | 4.56 | 4.25 |      |      |

**Exam**

|            |      |      |      |      |      |      |      |      |      |      |
|------------|------|------|------|------|------|------|------|------|------|------|
| Very bad   | 0    | 2    | 0    | 0    | 0    | 0    | 0    | 0    |      |      |
| Bad        | 1    | 3    | 5    | 1    | 5    | 0    | 0    | 0    |      |      |
| Moderate   | 8    | 9    | 6    | 24   | 7    | 2    | 2    | 1    | 0.00 | 0.03 |
| Good       | 33   | 45   | 16   | 55   | 10   | 38   | 6    | 6    |      |      |
| Very good  | 18   | 29   | 21   | 17   | 10   | 21   | 5    | 1    |      |      |
| Mean (1-5) | 4.13 | 4.09 | 4.10 | 3.91 | 3.78 | 4.31 | 4.23 | 4.00 |      |      |

**Privacy**

|            |      |      |      |      |      |      |      |      |      |      |
|------------|------|------|------|------|------|------|------|------|------|------|
| Very bad   | 0    | 1    | 0    | 0    | 0    | 0    | 0    | 0    |      |      |
| Bad        | 1    | 3    | 5    | 2    | 3    | 0    | 0    | 0    |      |      |
| Moderate   | 6    | 5    | 7    | 11   | 5    | 3    | 1    | 3    | 0.03 | 0.52 |
| Good       | 35   | 52   | 12   | 48   | 13   | 38   | 6    | 3    |      |      |
| Very good  | 21   | 27   | 23   | 36   | 11   | 20   | 7    | 2    |      |      |
| Mean (1-5) | 4.21 | 4.15 | 4.13 | 4.22 | 4.00 | 4.28 | 4.43 | 3.88 |      |      |

**Involvement**

|            |      |      |      |      |      |      |      |      |      |      |
|------------|------|------|------|------|------|------|------|------|------|------|
| Very bad   | 0    | 3    | 4    | 6    | 2    | 0    | 1    | 0    |      |      |
| Bad        | 2    | 8    | 13   | 15   | 10   | 1    | 0    | 2    |      |      |
| Moderate   | 11   | 24   | 4    | 29   | 3    | 8    | 2    | 5    | 0.00 | 0.00 |
| Good       | 40   | 35   | 7    | 38   | 7    | 39   | 4    | 0    |      |      |
| Very good  | 10   | 16   | 18   | 8    | 10   | 13   | 9    | 0    |      |      |
| Mean (1-5) | 3.92 | 3.62 | 3.48 | 3.28 | 3.41 | 4.05 | 4.25 | 2.71 |      |      |

**Equipment**

|          |   |    |    |    |   |    |   |   |      |      |
|----------|---|----|----|----|---|----|---|---|------|------|
| Very bad | 0 | 7  | 1  | 6  | 0 | 7  | 0 | 0 |      |      |
| Bad      | 4 | 8  | 3  | 25 | 3 | 2  | 2 | 0 | 0.00 | 0.00 |
| Moderate | 9 | 35 | 15 | 28 | 3 | 15 | 9 | 0 |      |      |

|                  |      |      |      |      |      |      |      |      |      |      |
|------------------|------|------|------|------|------|------|------|------|------|------|
| Good             | 36   | 32   | 15   | 29   | 15   | 21   | 4    | 8    |      |      |
| Very good        | 4    | 3    | 14   | 7    | 11   | 15   | 0    | 0    |      |      |
| Mean (1-5)       | 3.75 | 3.19 | 3.79 | 3.06 | 4.06 | 3.58 | 3.13 | 4.00 |      |      |
| <b>Clean</b>     |      |      |      |      |      |      |      |      |      |      |
| Very bad         | 1    | 2    | 5    | 0    | 3    | 0    | 0    | 0    |      |      |
| Bad              | 6    | 9    | 15   | 9    | 5    | 0    | 1    | 0    |      |      |
| Moderate         | 16   | 43   | 13   | 37   | 4    | 20   | 9    | 0    | 0.00 | 0.00 |
| Good             | 35   | 30   | 8    | 41   | 11   | 23   | 6    | 6    |      |      |
| Very good        | 5    | 4    | 7    | 10   | 9    | 18   | 0    | 2    |      |      |
| Mean (1-5)       | 3.59 | 3.28 | 2.94 | 3.54 | 3.56 | 3.97 | 3.31 | 4.25 |      |      |
| <b>Space</b>     |      |      |      |      |      |      |      |      |      |      |
| Very bad         | 5    | 4    | 7    | 4    | 2    | 0    | 1    | 0    |      |      |
| Bad              | 11   | 14   | 18   | 23   | 7    | 0    | 7    | 0    |      |      |
| Moderate         | 8    | 37   | 12   | 27   | 6    | 6    | 5    | 3    | 0.00 | 0.00 |
| Good             | 31   | 26   | 9    | 35   | 7    | 36   | 3    | 5    |      |      |
| Very good        | 6    | 7    | 1    | 8    | 10   | 19   | 0    | 0    |      |      |
| Mean (1-5)       | 3.36 | 3.20 | 2.55 | 3.21 | 3.50 | 4.21 | 2.63 | 3.63 |      |      |
| <b>Drug adq</b>  |      |      |      |      |      |      |      |      |      |      |
| Very bad         | 1    | 2    | 1    | 1    | 1    | 0    | 0    | 0    |      |      |
| Bad              | 2    | 2    | 6    | 10   | 6    | 0    | 1    | 0    |      |      |
| Moderate         | 18   | 18   | 10   | 35   | 3    | 1    | 6    | 5    | 0.00 | 0.00 |
| Good             | 35   | 47   | 7    | 33   | 10   | 37   | 4    | 3    |      |      |
| Very good        | 6    | 19   | 23   | 15   | 12   | 23   | 5    | 0    |      |      |
| Mean (1-5)       | 3.69 | 3.90 | 3.96 | 3.54 | 3.81 | 4.36 | 3.81 | 3.38 |      |      |
| <b>Diagnosis</b> |      |      |      |      |      |      |      |      |      |      |
| Very bad         | 0    | 1    | 0    | 0    | 0    | 0    | 0    | 0    |      |      |
| Bad              | 0    | 2    | 0    | 3    | 2    | 1    | 0    | 0    |      |      |
| Moderate         | 5    | 14   | 9    | 25   | 6    | 0    | 2    | 0    | 0.00 | 0.00 |
| Good             | 51   | 46   | 15   | 50   | 12   | 32   | 6    | 4    |      |      |
| Very good        | 7    | 25   | 24   | 19   | 12   | 28   | 8    | 4    |      |      |
| Mean (1-5)       | 4.03 | 4.05 | 4.31 | 3.88 | 4.06 | 4.43 | 4.38 | 4.50 |      |      |
| <b>Drug</b>      |      |      |      |      |      |      |      |      |      |      |

**prescribed**

|            |      |      |      |      |      |      |      |      |      |      |
|------------|------|------|------|------|------|------|------|------|------|------|
| Very bad   | 0    | 0    | 0    | 0    | 0    | 0    | 0    | 0    |      |      |
| Bad        | 0    | 0    | 0    | 0    | 4    | 0    | 0    | 0    |      |      |
| Moderate   | 4    | 12   | 13   | 24   | 4    | 2    | 1    | 1    | 0.00 | 0.00 |
| Good       | 47   | 53   | 12   | 53   | 12   | 32   | 5    | 5    |      |      |
| Very good  | 12   | 21   | 22   | 20   | 12   | 27   | 10   | 2    |      |      |
| Mean (1-5) | 4.13 | 4.10 | 4.19 | 3.96 | 4.00 | 4.41 | 4.56 | 4.13 |      |      |

**Drug Q**

|            |      |      |      |      |      |      |      |      |      |      |
|------------|------|------|------|------|------|------|------|------|------|------|
| Very bad   | 0    | 0    | 0    | 0    | 0    | 0    | 0    | 0    |      |      |
| Bad        | 1    | 2    | 0    | 2    | 0    | 0    | 0    | 0    |      |      |
| Moderate   | 6    | 7    | 8    | 15   | 7    | 1    | 1    | 1    | 0.00 | 0.00 |
| Good       | 42   | 54   | 17   | 54   | 12   | 31   | 6    | 2    |      |      |
| Very good  | 11   | 24   | 22   | 25   | 13   | 29   | 9    | 5    |      |      |
| Mean (1-5) | 4.05 | 4.15 | 4.30 | 4.06 | 4.19 | 4.46 | 4.50 | 4.50 |      |      |

**Treatment**

|            |      |      |      |      |      |      |      |      |      |      |
|------------|------|------|------|------|------|------|------|------|------|------|
| Very bad   | 0    | 0    | 0    | 0    | 0    | 0    | 0    | 0    |      |      |
| Bad        | 1    | 5    | 0    | 1    | 0    | 0    | 1    | 0    |      |      |
| Moderate   | 6    | 10   | 5    | 17   | 3    | 1    | 1    | 1    | 0.00 | 0.01 |
| Good       | 41   | 46   | 16   | 44   | 15   | 35   | 5    | 1    |      |      |
| Very good  | 15   | 25   | 26   | 33   | 14   | 25   | 9    | 6    |      |      |
| Mean (1-5) | 4.11 | 4.06 | 4.45 | 4.15 | 4.34 | 4.39 | 4.38 | 4.63 |      |      |

**Hours**

|            |      |      |      |      |      |      |      |      |      |      |
|------------|------|------|------|------|------|------|------|------|------|------|
| Very bad   | 2    | 2    | 1    | 0    | 0    | 0    | 0    | 0    |      |      |
| Bad        | 2    | 9    | 10   | 10   | 4    | 0    | 0    | 0    |      |      |
| Moderate   | 15   | 18   | 22   | 18   | 5    | 4    | 2    | 1    | 0.00 | 0.00 |
| Good       | 35   | 41   | 10   | 53   | 15   | 37   | 5    | 7    |      |      |
| Very good  | 9    | 18   | 5    | 16   | 8    | 20   | 9    | 0    |      |      |
| Mean (1-5) | 3.75 | 3.73 | 3.17 | 3.77 | 3.84 | 4.26 | 4.44 | 3.88 |      |      |

**Cost**

|          |   |   |   |   |   |   |   |   |      |      |
|----------|---|---|---|---|---|---|---|---|------|------|
| Very bad | 0 | 0 | 0 | 0 | 0 | 0 | 0 | 0 |      |      |
| Bad      | 0 | 0 | 0 | 0 | 0 | 0 | 0 | 0 | 0.67 | 0.60 |
| Moderate | 0 | 1 | 0 | 1 | 0 | 1 | 1 | 0 |      |      |



|                 |      |      |      |      |      |      |      |      |      |      |
|-----------------|------|------|------|------|------|------|------|------|------|------|
| Good            | 0    | 2    | 0    | 1    | 1    | 0    | 0    | 0    |      |      |
| Very good       | 63   | 85   | 45   | 95   | 30   | 59   | 15   | 5    |      |      |
| Mean (1-5)      | 5.00 | 4.95 | 5.00 | 4.97 | 4.97 | 4.97 | 4.88 | 5.00 |      |      |
| <b>Drugs</b>    |      |      |      |      |      |      |      |      |      |      |
| Very bad        | 1    | 0    | 2    | 0    | 1    | 0    | 0    | 0    |      |      |
| Bad             | 3    | 2    | 1    | 4    | 3    | 0    | 2    | 0    |      |      |
| Moderate        | 11   | 10   | 14   | 23   | 6    | 2    | 3    | 1    | 0.00 | 0.01 |
| Good            | 38   | 51   | 10   | 46   | 10   | 35   | 6    | 6    |      |      |
| Very good       | 10   | 24   | 20   | 24   | 12   | 24   | 4    | 1    |      |      |
| Mean (1-5)      | 3.84 | 4.11 | 3.96 | 3.93 | 3.91 | 4.36 | 3.80 | 4.00 |      |      |
| <b>Distance</b> |      |      |      |      |      |      |      |      |      |      |
| Very bad        | 5    | 1    | 7    | 9    | 5    | 0    | 3    | 0    |      |      |
| Bad             | 5    | 11   | 17   | 22   | 13   | 1    | 4    | 6    |      |      |
| Moderate        | 17   | 19   | 14   | 23   | 6    | 13   | 4    | 1    | 0.00 | 0.00 |
| Good            | 30   | 46   | 8    | 31   | 7    | 33   | 3    | 1    |      |      |
| Very good       | 6    | 11   | 1    | 12   | 1    | 14   | 2    | 0    |      |      |
| Mean (1-5)      | 3.43 | 3.63 | 2.55 | 3.15 | 2.56 | 3.98 | 2.81 | 2.38 |      |      |
| <b>Wait</b>     |      |      |      |      |      |      |      |      |      |      |
| Very bad        | 12   | 8    | 15   | 9    | 5    | 0    | 6    | 0    |      |      |
| Bad             | 11   | 16   | 14   | 20   | 14   | 1    | 0    | 2    |      |      |
| Moderate        | 17   | 32   | 11   | 30   | 5    | 15   | 6    | 6    | 0.00 | 0.00 |
| Good            | 18   | 24   | 8    | 33   | 7    | 38   | 4    | 0    |      |      |
| Very good       | 5    | 8    | 0    | 5    | 1    | 7    | 0    | 0    |      |      |
| Mean (1-5)      | 2.89 | 3.09 | 2.25 | 3.05 | 2.53 | 3.84 | 2.50 | 2.75 |      |      |

## Appendix References

1. Republic of Zambia Ministry of Health: *The 2012 List of Health Facilities in Zambia*. 2013.
2. Republic of Zambia Central Statistical Office: *Zambia 2010 Census of Population and Housing*. 2011.
3. Central Statistical Office (CSO) [Zambia], Ministry of Health (MOH) [Zambia], and ICF International: *Demographic and Health Survey Zambia 2013-14*. Rockville, Maryland, USA: Central Statistical Office, Ministry of Health, and ICF International; 2014.
